# Supplementary material
Source: MDPI journal article supplement (https://www.mdpi.com/2073-4441/14/20/3213)
Supplement: s1 [file s1]

## Supplementary Materials

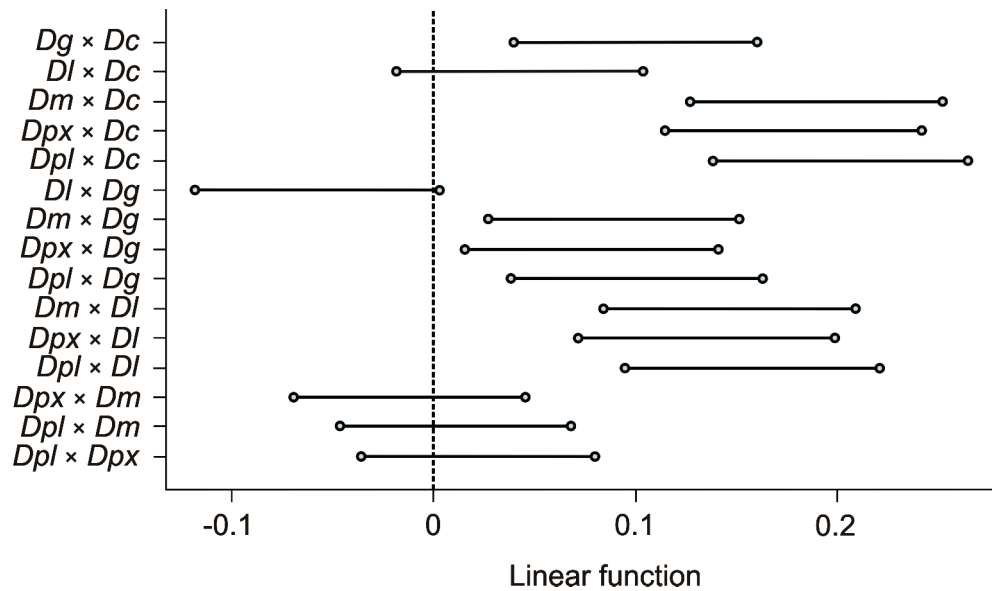

**Figure S1.** 95% confidence intervals for the differences in growth rate ( $d^{-1}$ ) between each studied species.

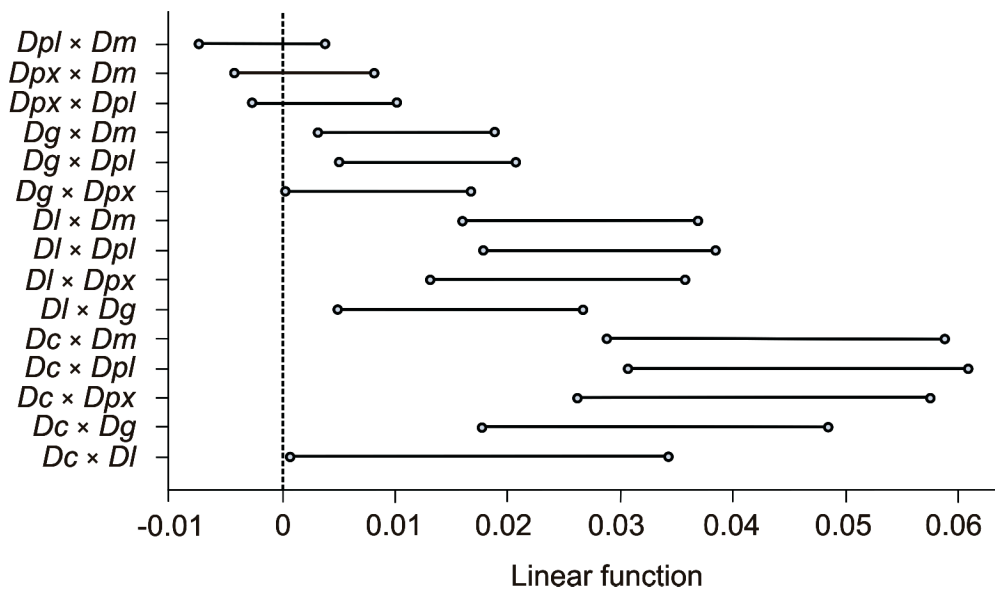

**Figure S2.** 95% bootstrapped confidence intervals for the differences in the threshold food concentration ( $\text{mg C}_{\text{org}} \times \text{L}^{-1}$ ) between each studied species in normoxia.

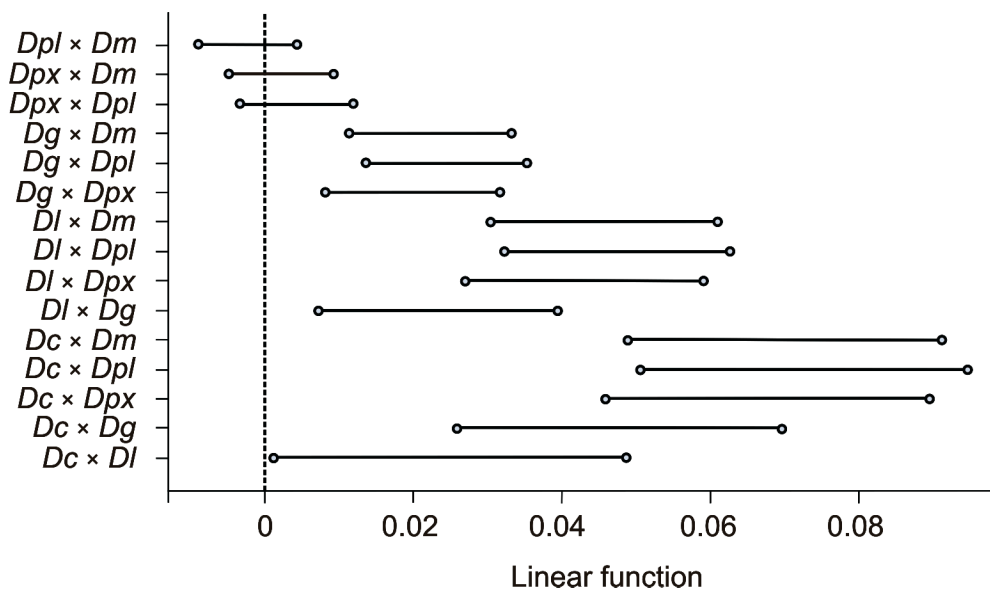

**Figure S3.** 95% bootstrapped confidence intervals for the differences in the threshold food concentration (mg C<sub>org</sub> × L<sup>-1</sup>) between each studied species in hypoxia.

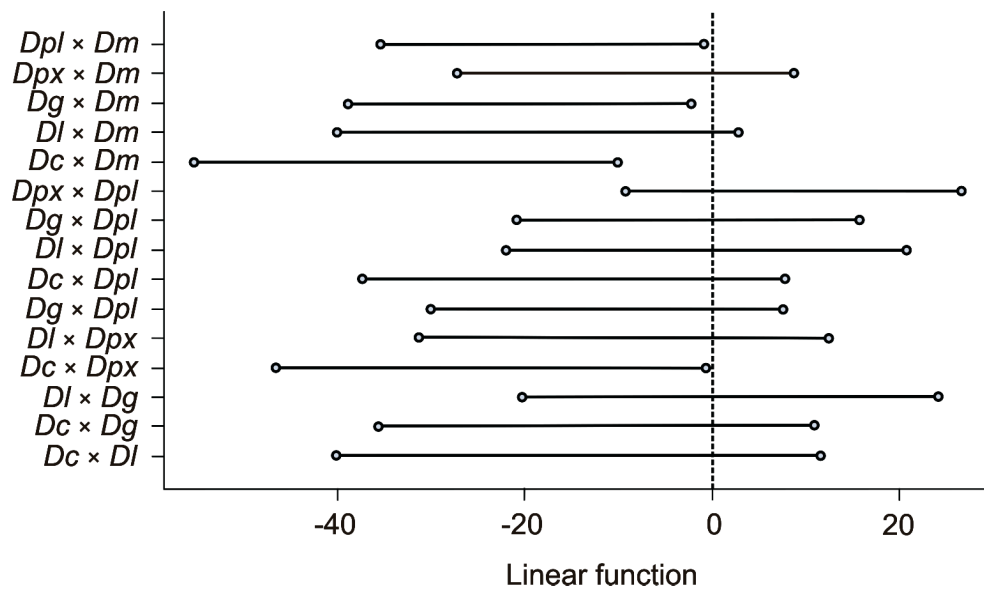

**Figure S4.** 95% confidence intervals for the differences in haemoglobin production ( $\mu\text{g} \times \text{mg}^{-1}$ ) between each studied species.

**Table S1.** *Daphnia* species and clones used in our study, as well as their body size at first reproduction (mm), date of their isolation and their location of origin.

| Species              | Clone | Body size at first reproduction (mm) | Date of isolation | Location                                      |
|----------------------|-------|--------------------------------------|-------------------|-----------------------------------------------|
| <i>D. cucullata</i>  | CT2   | 0.81                                 | 04.2020           | Poland<br>(53°40'19.5"N 21°55'43.2"E)         |
| <i>D. cucullata</i>  | CT1   | 0.81                                 | 04.2020           | Poland<br>(53°40'19.5"N 21°55'43.2"E)         |
| <i>D. cucullata</i>  | CR2   | 0.80                                 | 04.2020           | Poland<br>(53°40'19.5"N 21°55'43.2"E)         |
| <i>D. cucullata</i>  | CR1   | 0.81                                 | 04.2020           | Poland<br>(53°40'19.5"N 21°55'43.2"E)         |
| <i>D. longispina</i> | LB2   | 1.34                                 | 04.2020           | Poland<br>(53°61'41.7"N 21°74'15.5"E)         |
| <i>D. longispina</i> | LR12  | 1.35                                 | 04.2020           | Poland<br>(53°40'19.5"N 21°55'43.2"E)         |
| <i>D. longispina</i> | LB1   | 1.36                                 | 04.2020           | Poland<br>(53°61'41.7"N 21°74'15.5"E)         |
| <i>D. longispina</i> | LR4   | 1.36                                 | 04.2020           | Poland<br>(53°40'19.5"N 21°55'43.2"E)         |
| <i>D. galeata</i>    | GB1   | 1.43                                 | 06.2016           | Germany<br>(54°19'27.3"N 10°37'53.2"E)        |
| <i>D. galeata</i>    | GB2   | 1.41                                 | 06.2016           | Germany<br>(54°19'27.3"N 10°37'53.2"E)        |
| <i>D. galeata</i>    | Brz3  | 1.41                                 | 04.2020           | Poland<br>(53°61'41.7, 21°74'15.5)            |
| <i>D. galeata</i>    | GB7   | 1.40                                 | 06.2016           | Germany<br>(54°19'27.3"N 10°37'53.2"E)        |
| <i>D. pulex</i>      | PC69  | 1.58                                 | 05.2020           | Poland<br>(53°41'58.7"N 21°55'39.0"E)         |
| <i>D. pulex</i>      | PB1   | 1.52                                 | 06.2016           | Germany<br>(54°19'27.3"N 10°37'53.2"E)        |
| <i>D. pulex</i>      | PB2   | 1.53                                 | 06.2016           | Germany<br>(54°19'27.3"N 10°37'53.2"E)        |
| <i>D. pulex</i>      | Pc6   | 1.58                                 | 05.2020           | Poland<br>(53°41'58.7"N 21°55'39.0"E)         |
| <i>D. pulicaria</i>  | PD02  | 1.83                                 | 05.2020           | Poland<br>(53°69'08.1"N 21°89'38.5"E)         |
| <i>D. pulicaria</i>  | PCB1  | 1.85                                 | 08.2016           | Germany<br>(54°19'27.3"N 10°37'53.2"E)        |
| <i>D. pulicaria</i>  | PCB2  | 1.85                                 | 08.2016           | Germany<br>(54°19'27.3"N 10°37'53.2"E)        |
| <i>D. pulicaria</i>  | G8    | 1.60                                 | 07.2017           | Switzerland<br>(47°20'51.3"N 8°41'21.3"E)     |
| <i>D. magna</i>      | MB02  | 1.95                                 | 08.2016           | Germany<br>(54°19'27.3"N 10°37'53.2"E)        |
| <i>D. magna</i>      | MB01  | 1.96                                 | 08.2016           | Germany<br>(54°19'27.3"N 10°37'53.2"E)        |
| <i>D. magna</i>      | D     | 1.93                                 | 07.2013           | Czech Republic<br>(50°31'62.9"N 13°89'45.4"E) |
| <i>D. magna</i>      | N     | 1.92                                 | 07.2013           | Czech Republic<br>(49°75'05.3"N 14°13'88.1"E) |
